# Supplementary material
Source: Springer Nature journal article supplement (https://www.springermedizin.de/resource/supplementary/12891_2008_569_MOESM1_ESM.pdf/9511356)
Supplement: MOESM1 [file 9511356]

Clearwater Osteoarthritis Study  
subjects  
(n=3664)

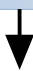

Knee replacement surgery = No  
(n = 3635)

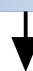

Radiographic knee  
osteoarthritis = Yes  
(n = 620)

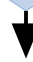

History of knee trauma = No  
(n = 581)

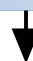

Body mass index  $\geq 18.50$  (kg / m<sup>2</sup>)  
(n = 577)

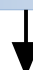

No missing data  
(n = 576)
